# Supplementary material
Source: PubMed Central journal article supplement (PMC3309066)

Figure S2a

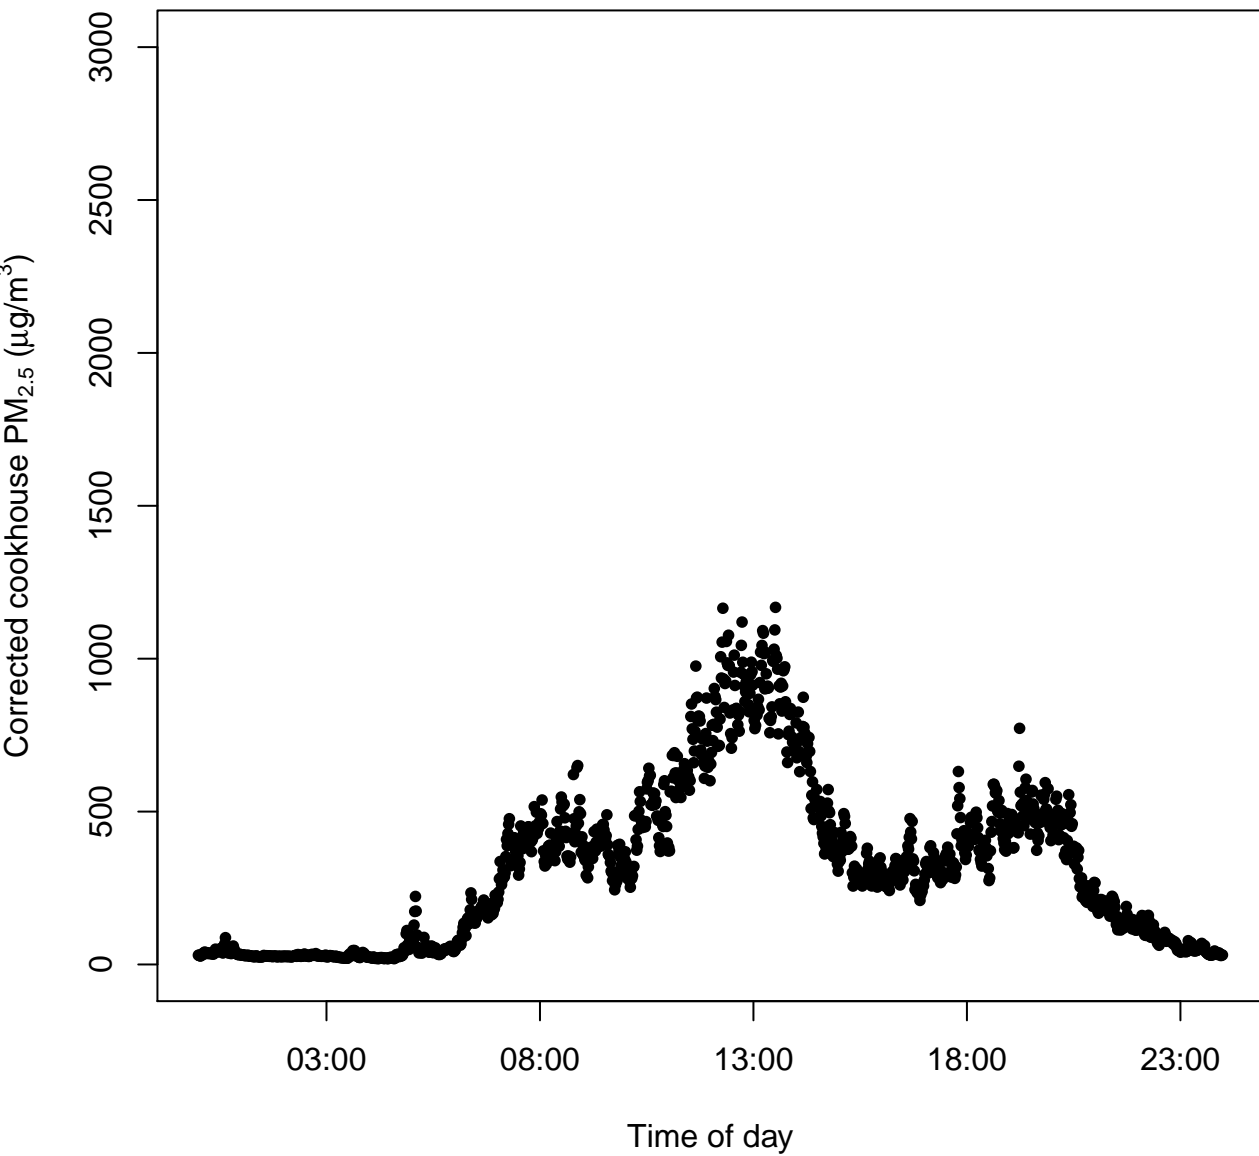

Figure S2b

### Banjul

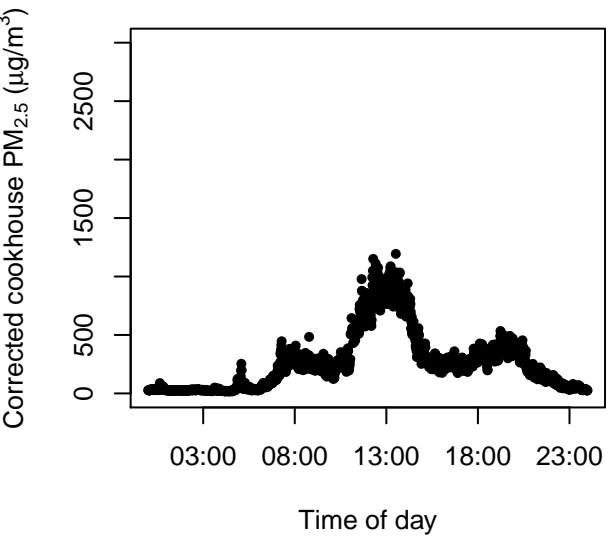

### Basse

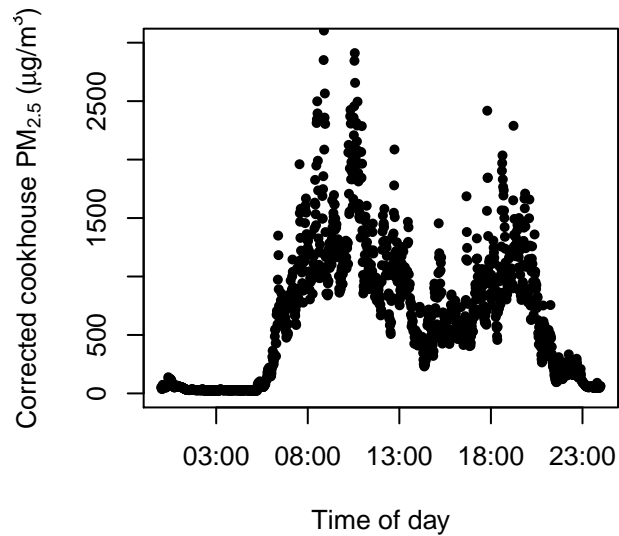

Figure S2c

### Dry months

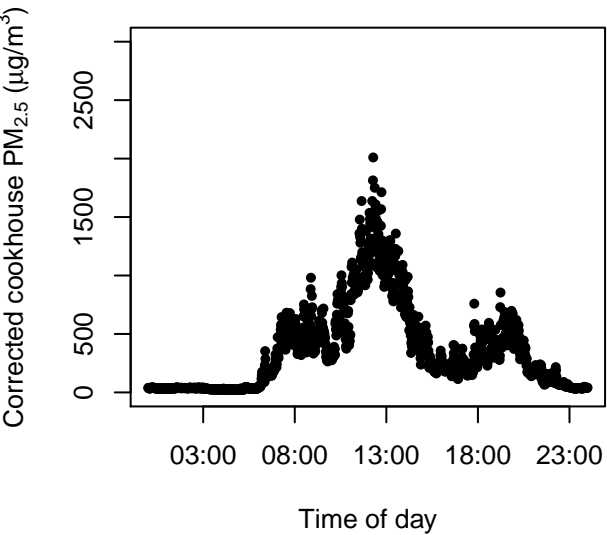

### Rainy months

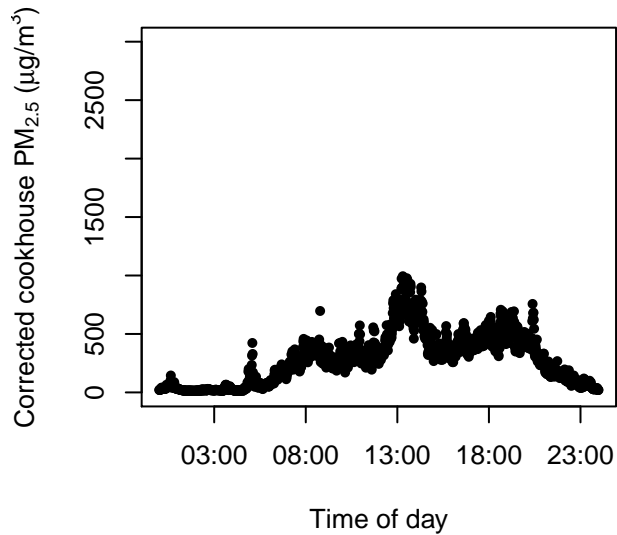

Figure S2d

### Collected firewood

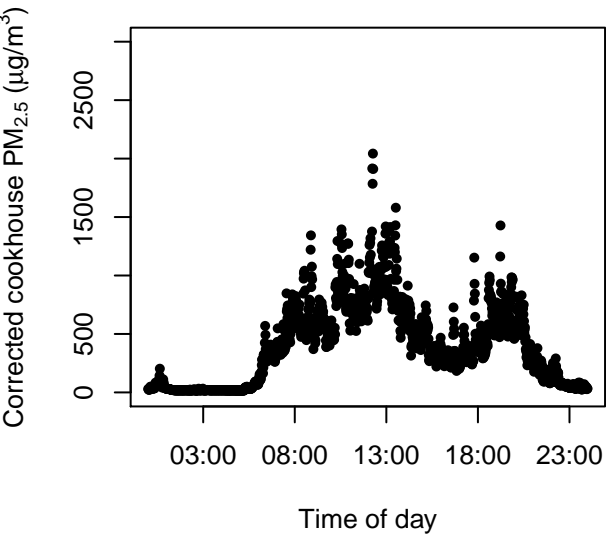

### Purchased firewood

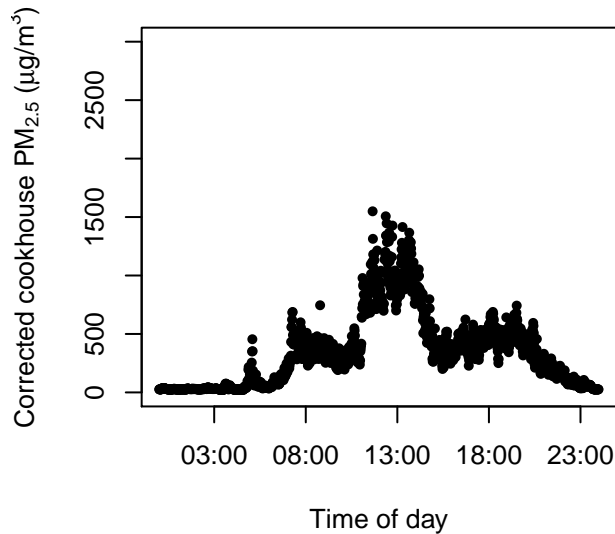

### Charcoal

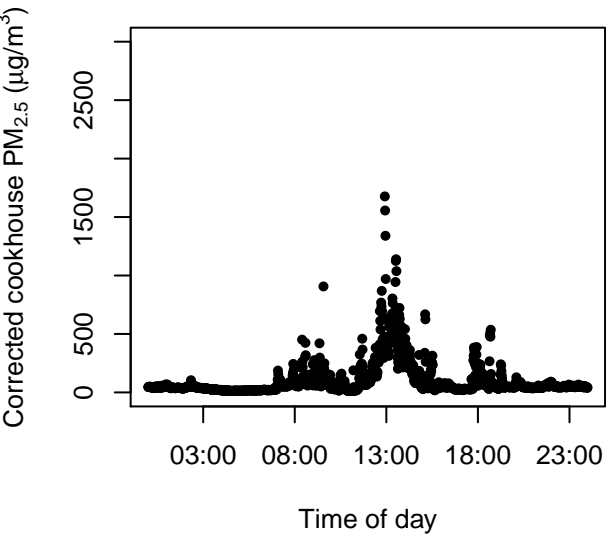

Supplement: NIHMS360343-supplement-3_si_003.pdf [file NIHMS360343-supplement-3_si_003.pdf]
