# Supplementary material
Source: PubMed Central journal article supplement (PMC3309066)

Figure S9

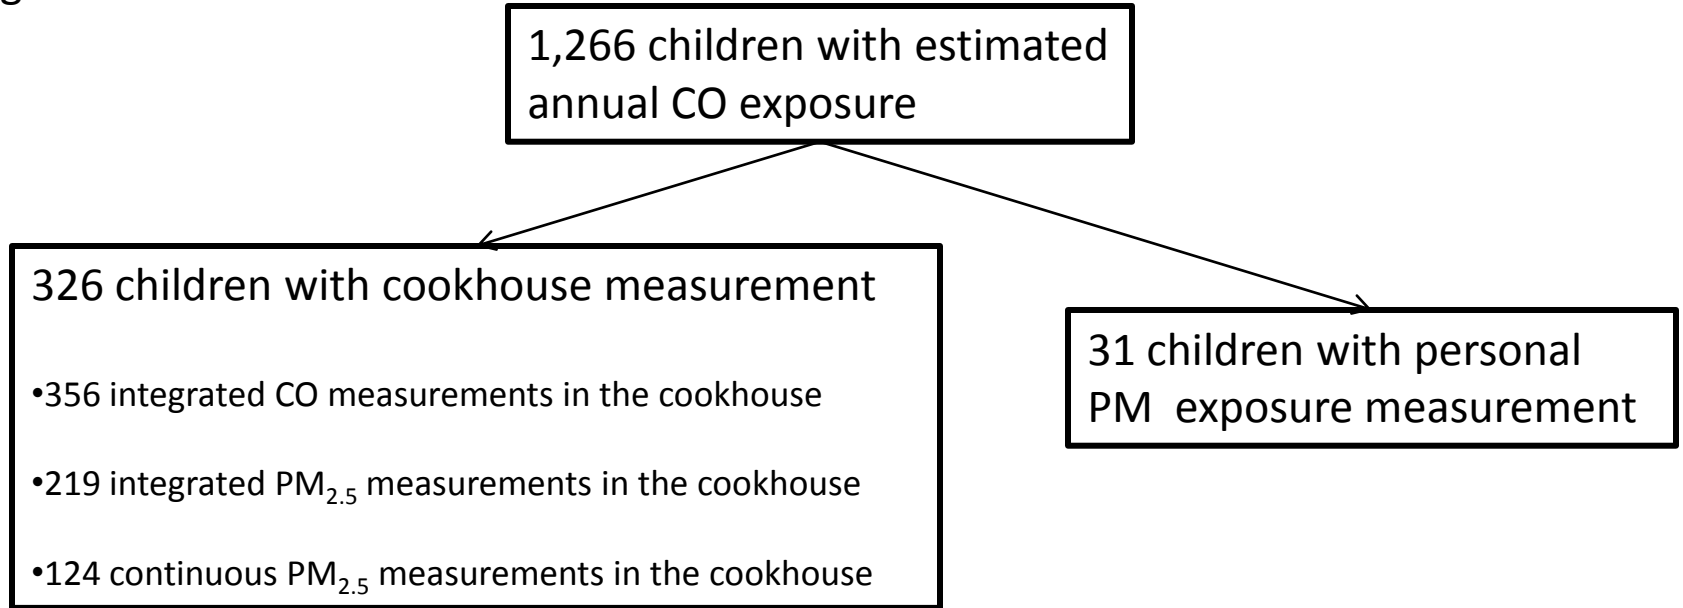

Supplement: NIHMS360343-supplement-10_si_010.pdf [file NIHMS360343-supplement-10_si_010.pdf]

Figure S1

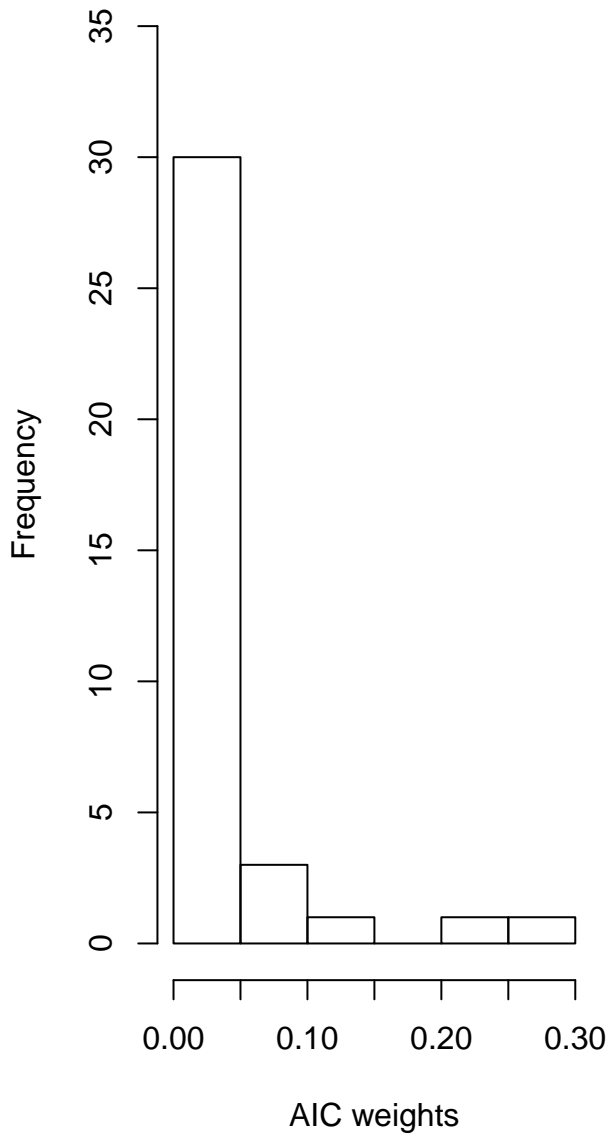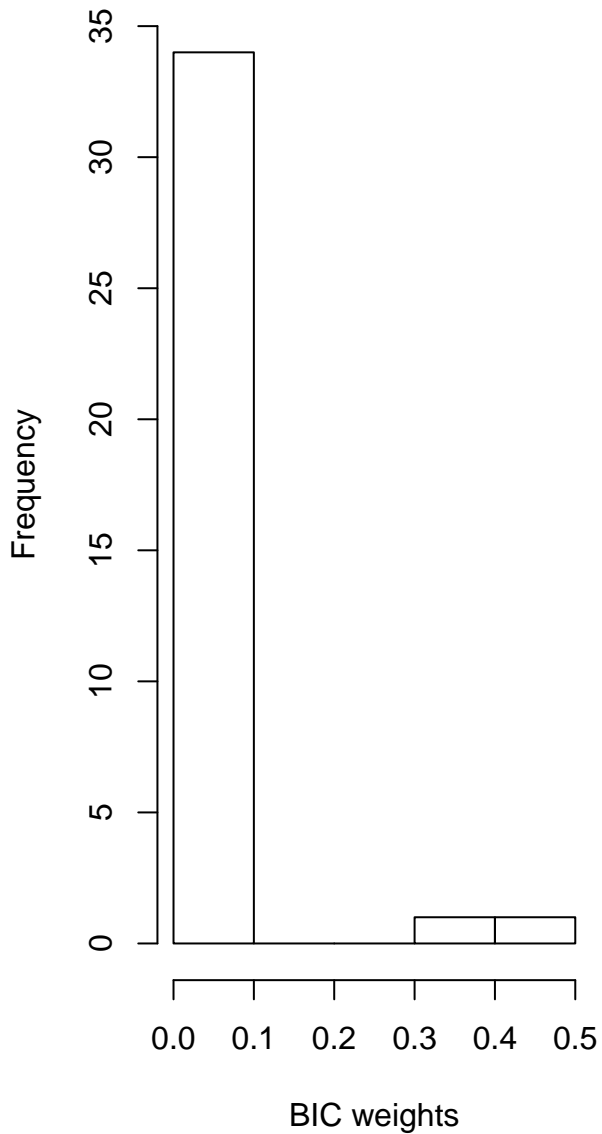

Supplement: NIHMS360343-supplement-2_si_002.pdf [file NIHMS360343-supplement-2_si_002.pdf]

Figure S3

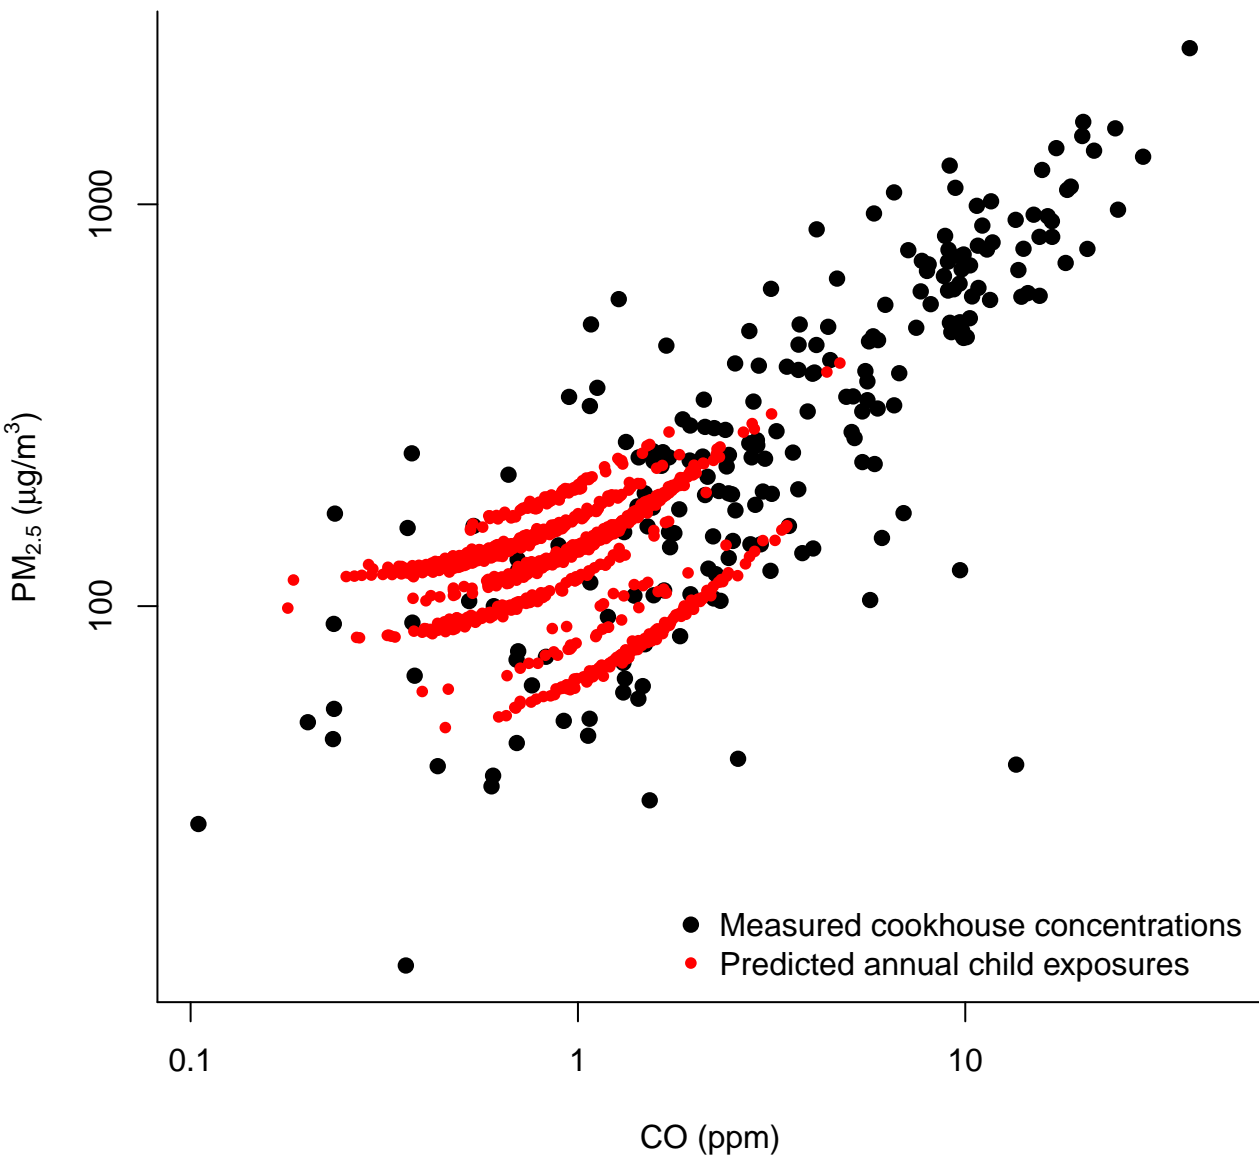

Supplement: NIHMS360343-supplement-4_si_004.pdf [file NIHMS360343-supplement-4_si_004.pdf]

Figure S4

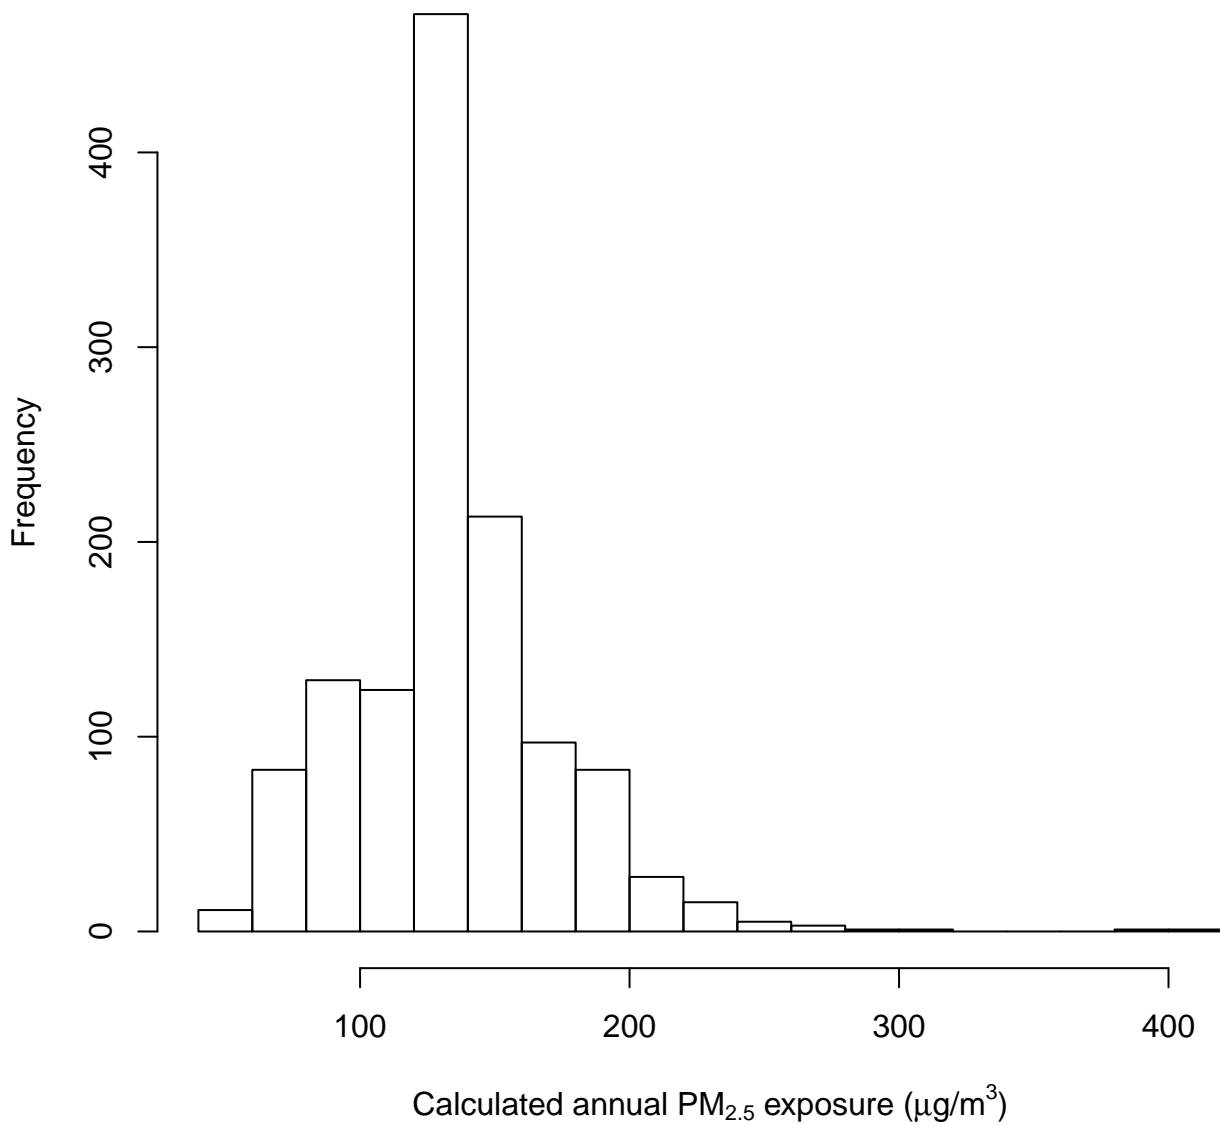

Supplement: NIHMS360343-supplement-5_si_005.pdf [file NIHMS360343-supplement-5_si_005.pdf]

Figure S5

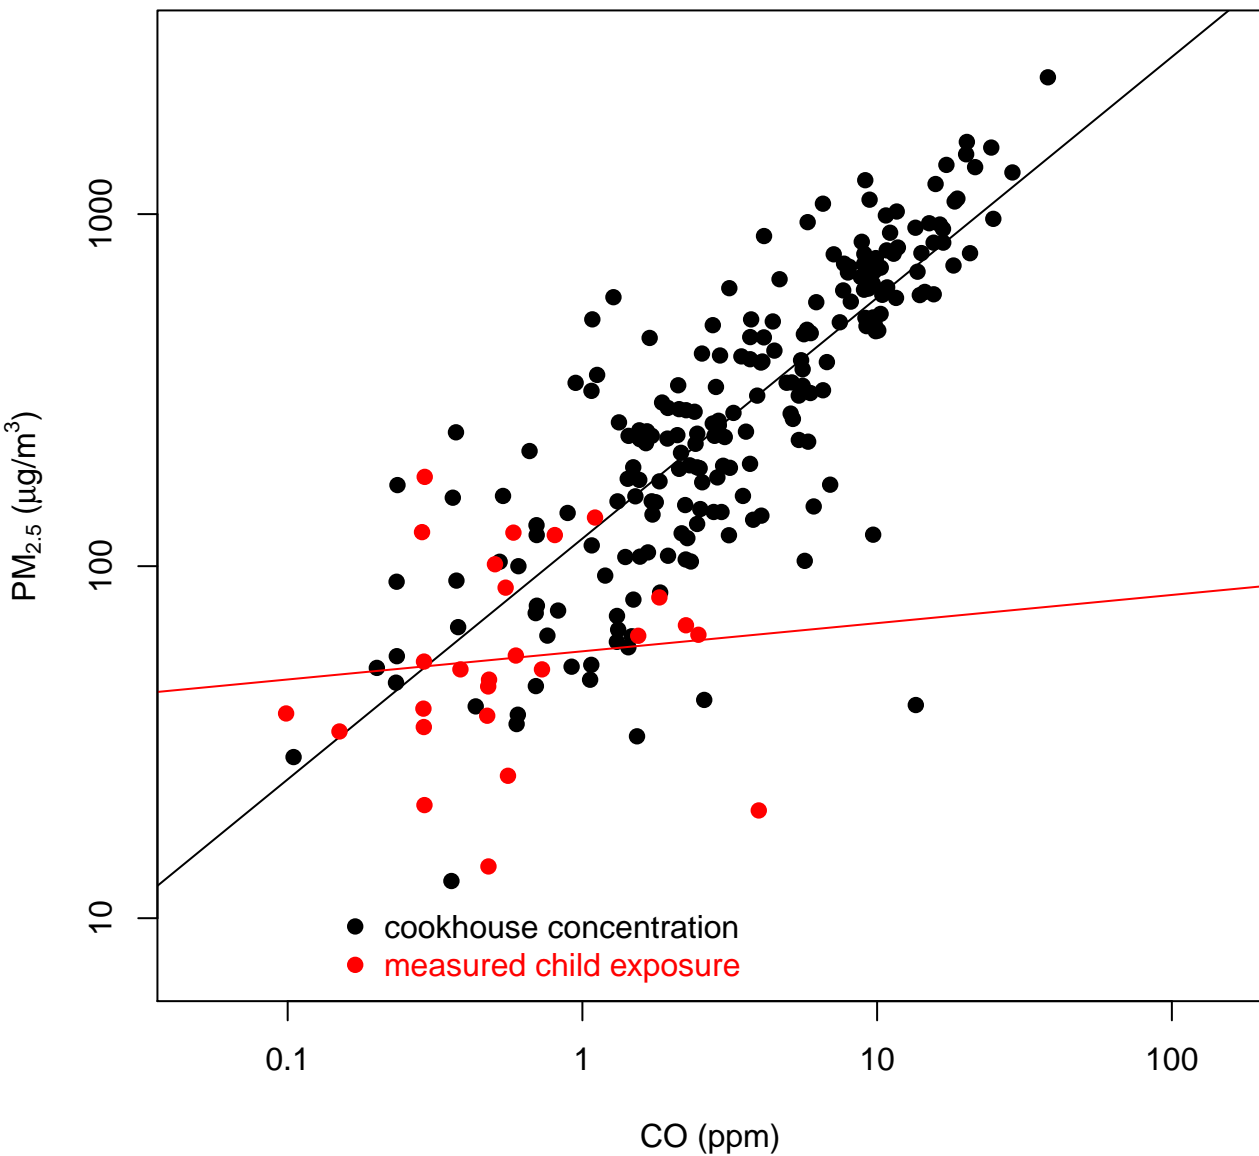

Supplement: NIHMS360343-supplement-6_si_006.pdf [file NIHMS360343-supplement-6_si_006.pdf]

Figure S6

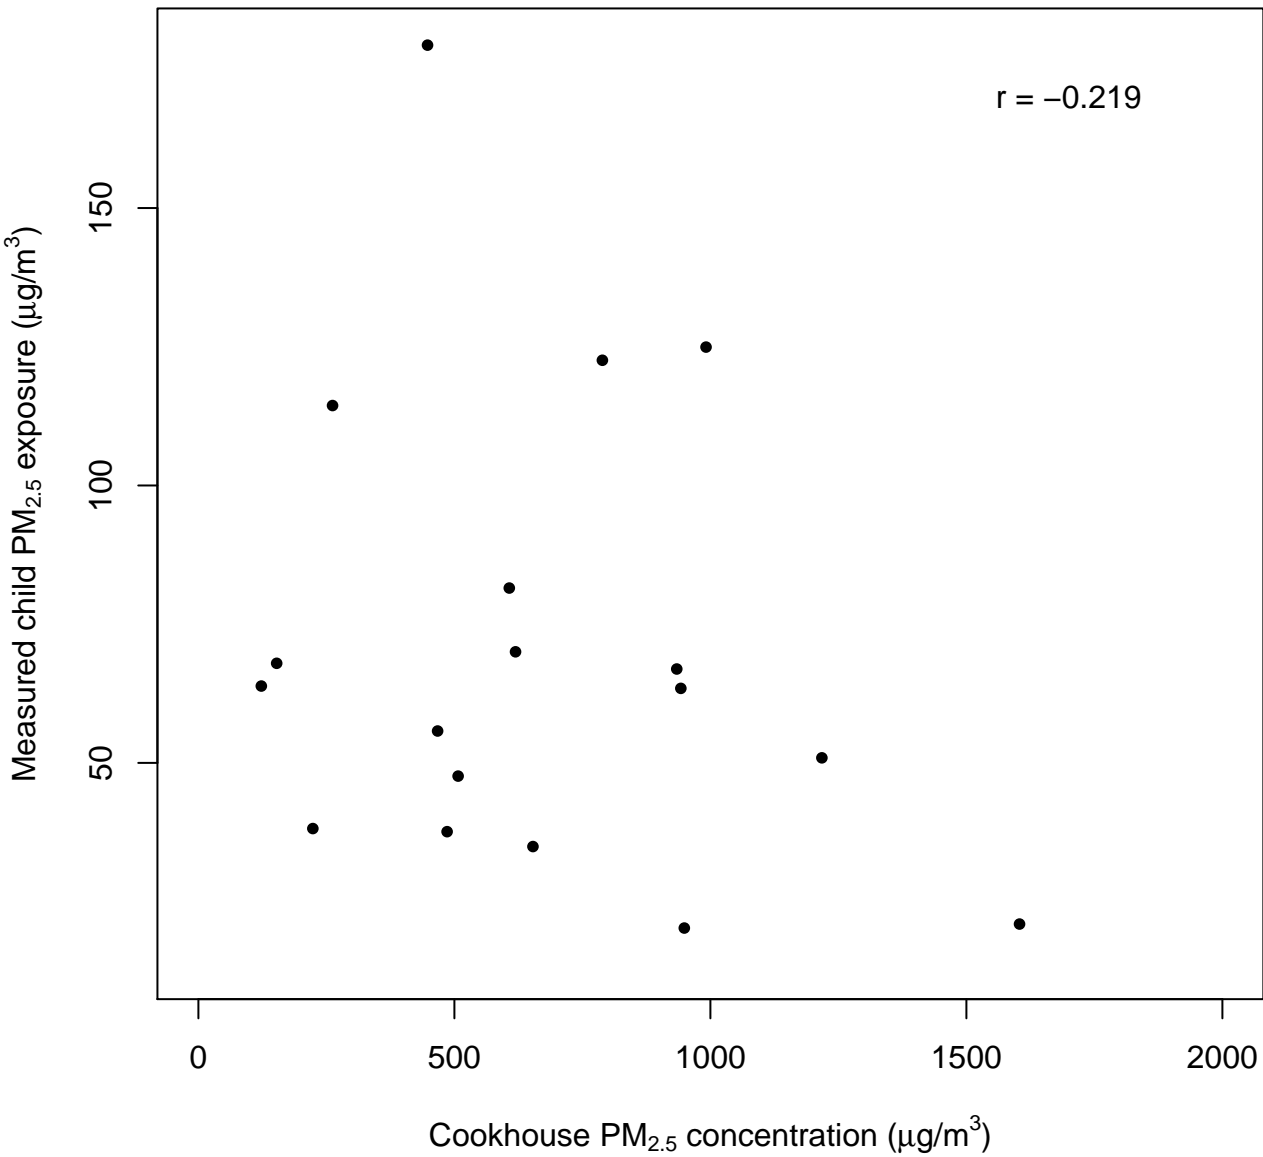

Supplement: NIHMS360343-supplement-7_si_007.pdf [file NIHMS360343-supplement-7_si_007.pdf]

Figure S7

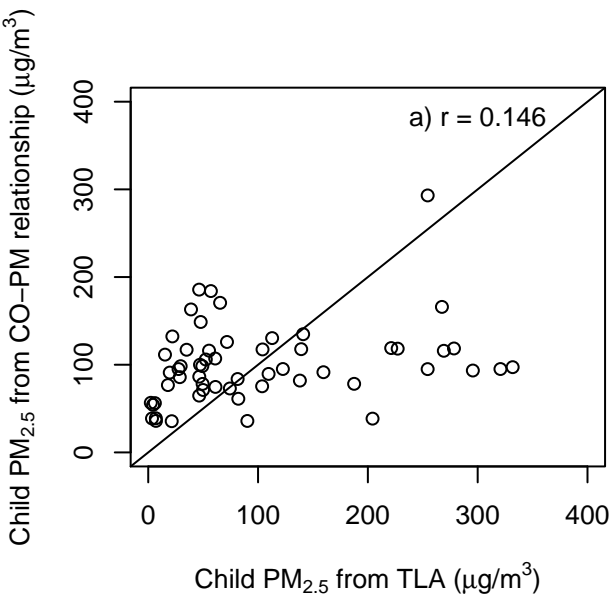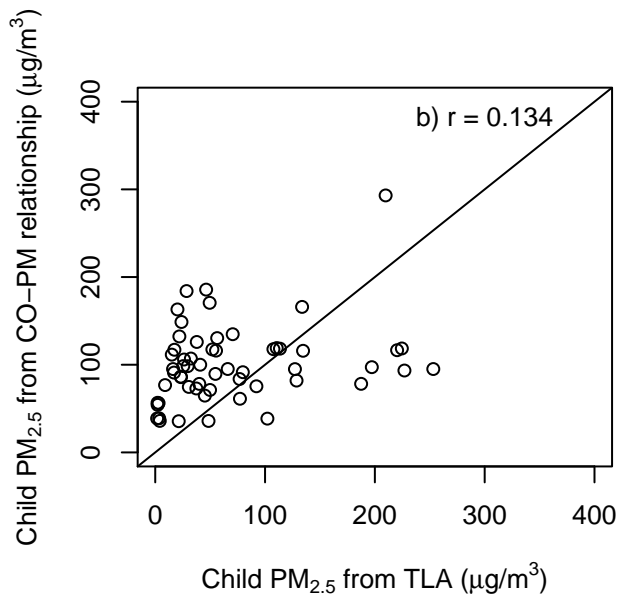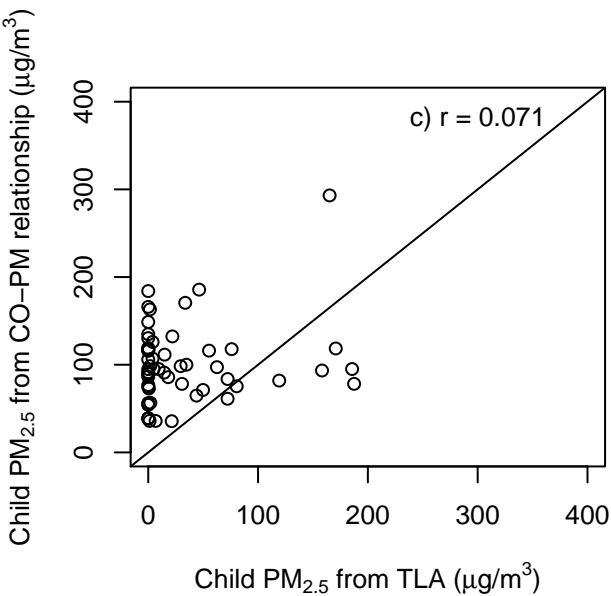

Supplement: NIHMS360343-supplement-8_si_008.pdf [file NIHMS360343-supplement-8_si_008.pdf]

Figure S8

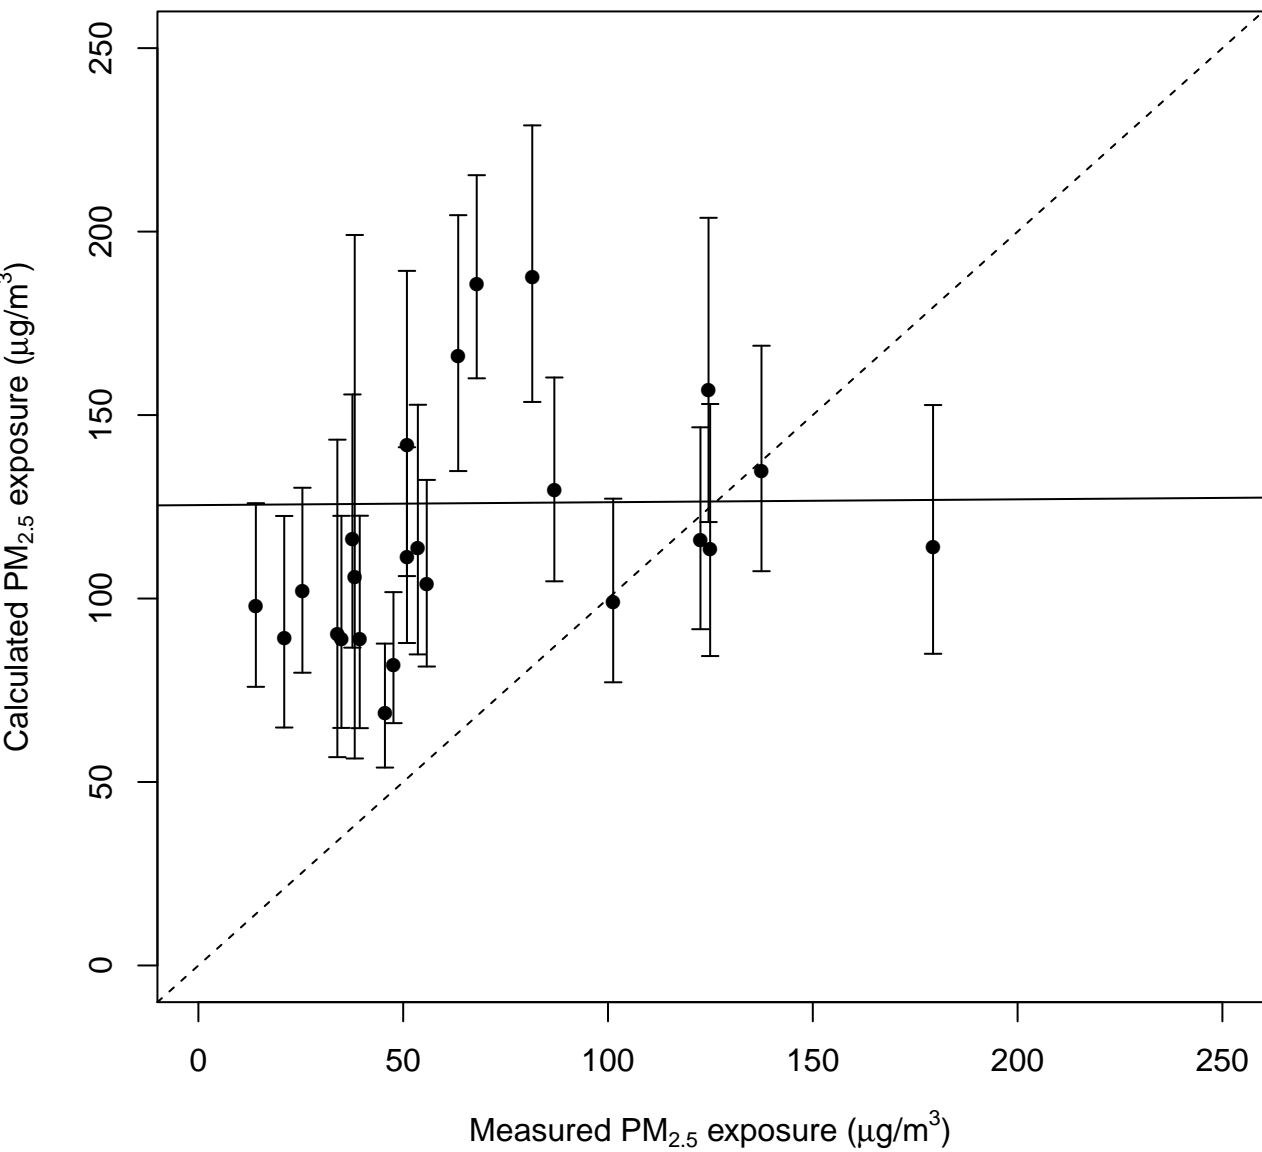

Supplement: NIHMS360343-supplement-9_si_009.pdf [file NIHMS360343-supplement-9_si_009.pdf]
